# Supplementary material for: Assessing the performance and explainability of an avalanche danger forecast model
Source: Copernicus journal article supplement (doi:10.5194/egusphere-2024-2374), 2024-08-06
Supplement: Supplementary file [file egusphere-2024-2374-RC3-supplement.pdf]

# Review EGU sphere 2024-2374

[egusphere-2024-2374.pdf](https://egusphere-2024-2374.pdf) ([copernicus.org](https://copernicus.org)).

The authors evaluate the performance and interpretability of a random forest model trained to predict avalanche danger levels under dry-snow conditions. Their machine learning model aligns well with human forecaster assessments when used operationally alongside them, providing a higher temporal resolution in danger level assessments. However, the model underperforms in situations where persistent weak layers dictate the avalanche danger.

A challenge in evaluating complex machine learning models, often referred to as "black-box" models, is discerning the rationale behind the model's outputs. The authors employ the SHAP (Shapley Additive Explanations) method to identify and explain which input parameters most strongly influence the model's predictions. By understanding the model's decision-making process, avalanche forecasters can better trust and validate its assessments. This interpretability allows forecasters to compare the model's analysis with their own, offering insight into potential discrepancies and prompting consideration of overlooked factors in their own assessments. Comprehensible model results can also be a valuable tool for forecaster training to showcase which parameters to consider given certain avalanche conditions. This work showcases how to increase the value of machine learning models for operational avalanche forecasting and similar operations.

This study demonstrates how enhancing model interpretability can enhance the practical value of machine learning models in operational avalanche forecasting or similar operations. I recommend to publish this paper after considering my points listed in my detailed comments below.

Kind regards, Karsten Müller.

## Detailed comments

Paper title: Consider replacing "explainability" by "interpretability".

Line 10: "...though it decreased the performance during periods..." - the performance of what?

Line 111: remove "the" before 60% and "s" in predicts and remove "of" after danger level.

Line 136: "...with only one avalanche forecaster having access to the predictions." Do you mean "only one that is currently on duty" or "only one forecast from the entire forecasting group not necessarily participating in the assessment"? Please clarify.

Table 1: the abbreviation, " $\Delta D_{bu,a}$ " is only explained in appendix. Please explain it here if you use it in the table caption.

Line 244: "old snow problem (OS)" - consider replacing the term "old snow" by the EAWS standard name for the avalanche problem "persistent weak layer (PWL)".

Figure 6: Please consider using the same scales in plots a and b and c and d. Or add a note in the caption that different scales are used. "old snow" see comment to line 244.

Line 327 and following paragraph: It is not clear to me what is meant here - please consider rephrasing.

Line 339: Swap words "slope" and "virtual": ...for four virtual slope aspects...

Line 352: Please state more clearly what do you mean by "both types"?

Line 371: put "Schweizer et al., 2020" at all in parenthesis.

Line 373: "rapid increases and danger levels correlating with forecast in the bulletin..."

Replace "forecast" with "danger level" or just leave it out.

Line 374: again, consider replacing OS problem by PWL problem.

Line 405: have you considered using "minimum and maximum temperature or temperature difference during the day" or "strongest temperature change over six hours" as an input parameter to capture rapid temperature changes?

Line 431: please check this sentence. Is there a comma missing after stability indices?

Line 577: remove reference to Techel et al. ... discussion.
